# Supplementary material for: Effect of Tree Nuts on Glycemic Control in Diabetes: A Systematic Review and Meta-Analysis of Randomized Controlled Dietary Trials
Source: PubMed Central journal article supplement (PMC4116170; doi:10.1371/journal.pone.0103376), 2014-07-30

# FIGURE S3

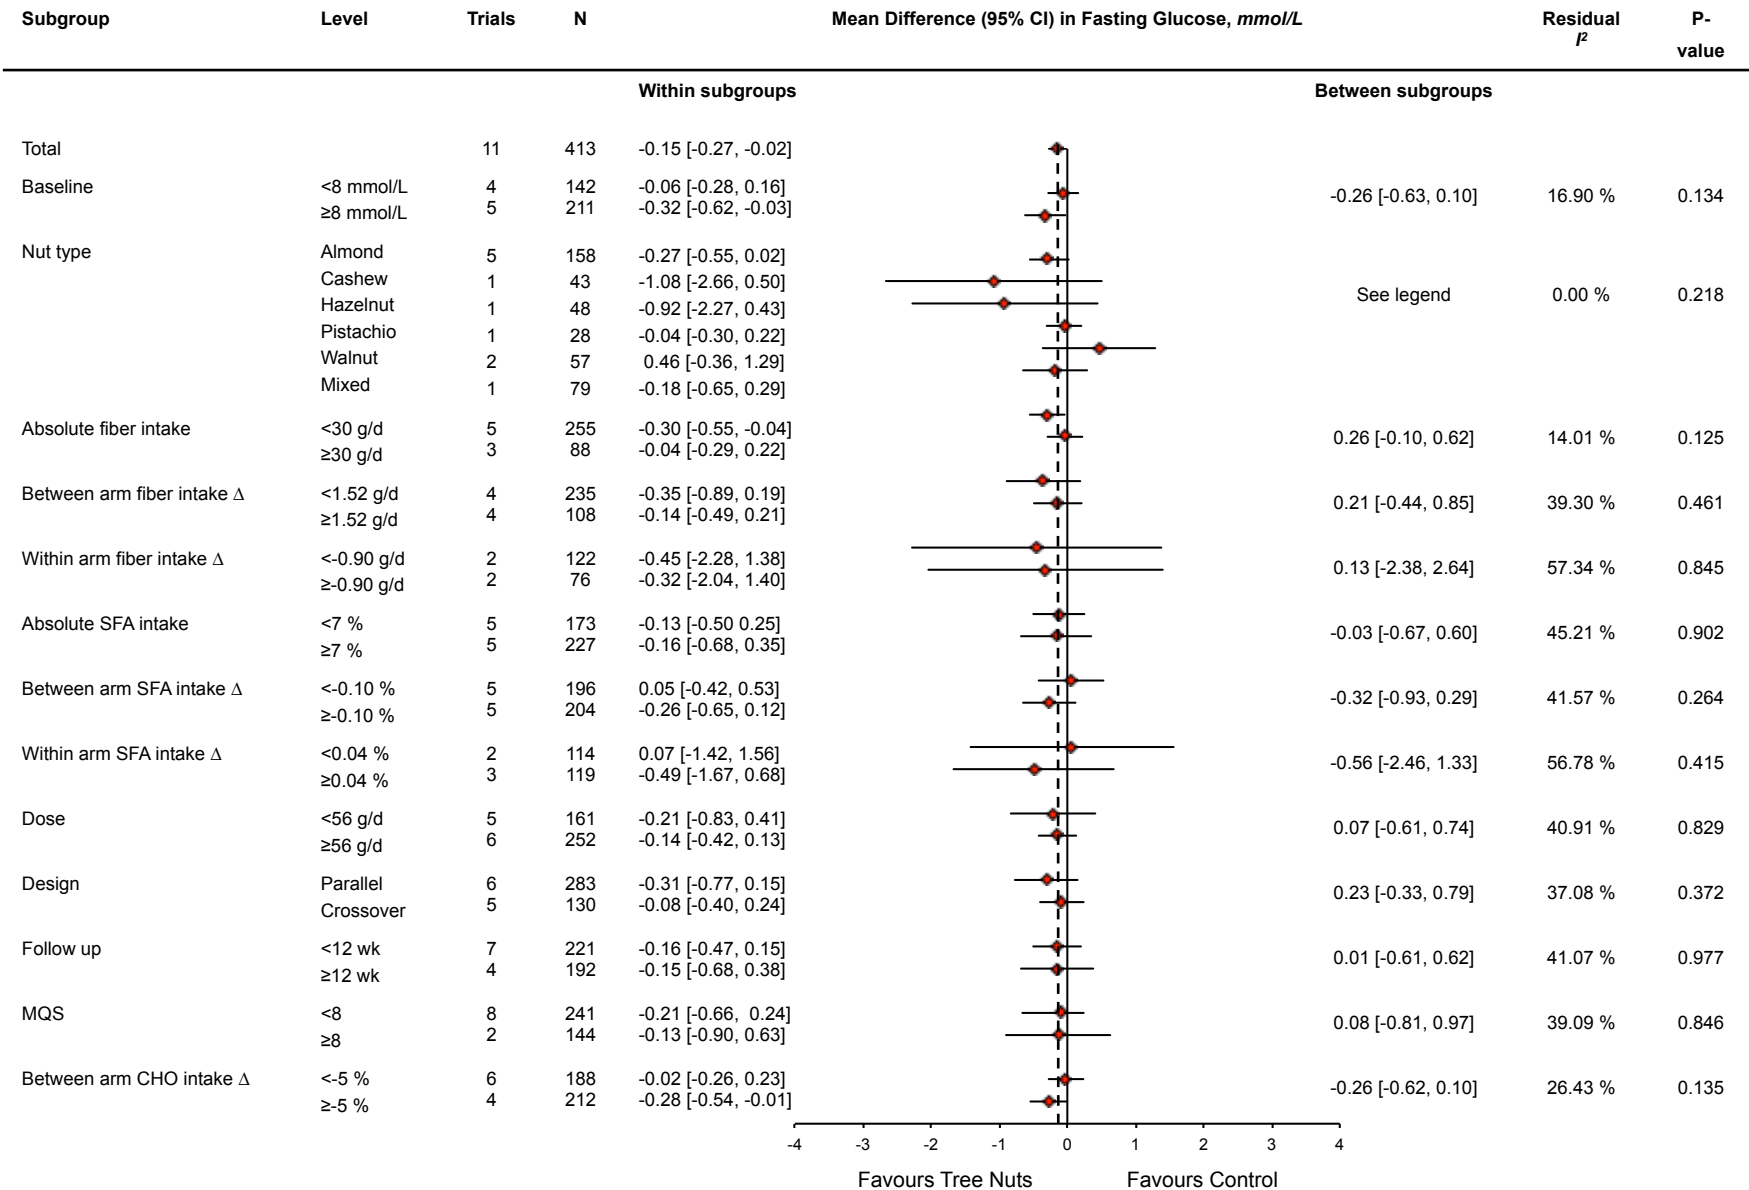

Supplement: pone.0103376.s003.pdf [file pone.0103376.s003.pdf]
